# Supplementary material for: Synthesis and characterization of a phosphorus-containing flame retardant with double bonds and its application in bismaleimide resins
Source: Royal Society of Chemistry journal article supplement (doi:10.1039/c5ra15946f), 2015-01-01
Supplement: c5ra15946f1.pdf [file c5ra15946f1.pdf]

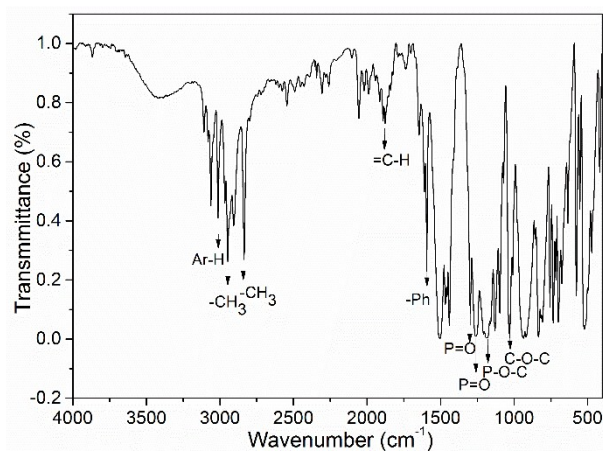

Figure 1 FTIR spectrum of MPP

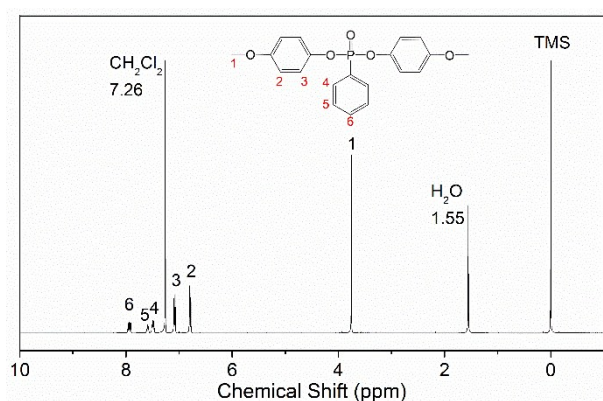

Figure 2 <sup>1</sup>H NMR spectrum of MPP

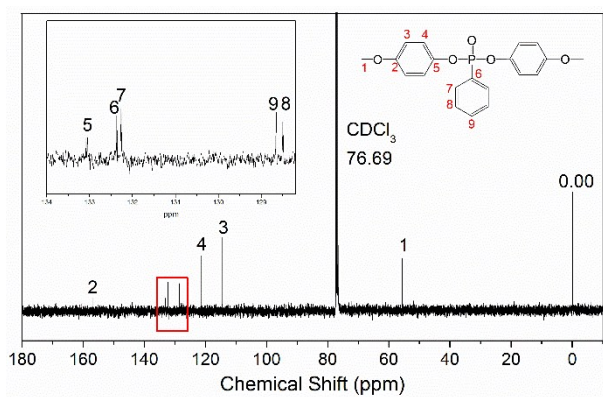

Figure 3 <sup>13</sup>C NMR spectrum of MPP

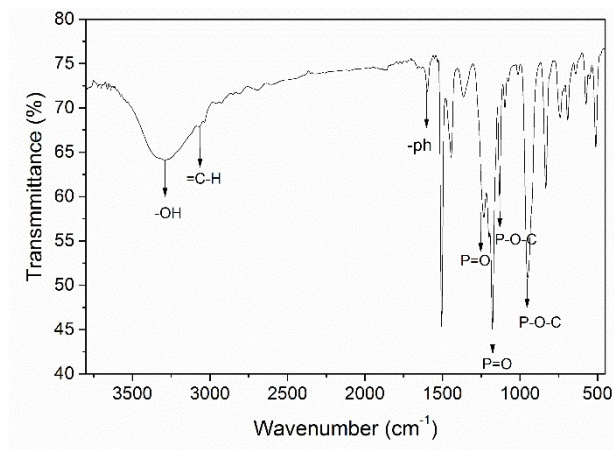

Figure 4 FTIR spectrum of HPP

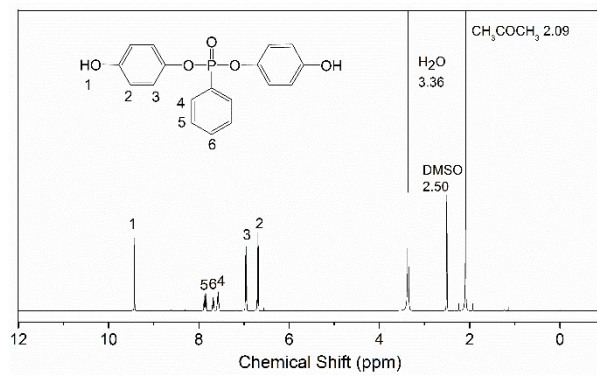

Figure 5 <sup>1</sup>H NMR spectrum of HPP

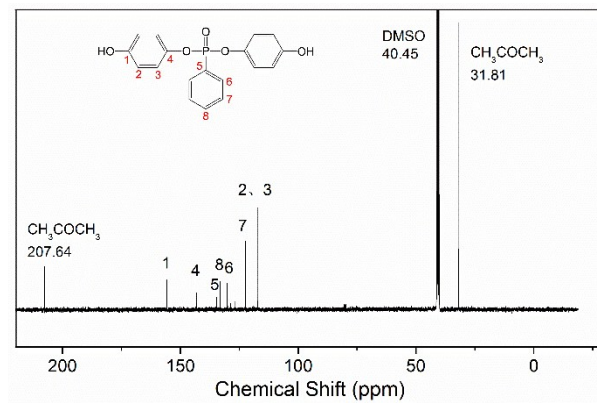

Figure 6 <sup>13</sup>C NMR spectrum of HPP
